# Supplementary material for: Poly(lactic acid)-hyperbranched polyglycerol nanoparticles enhance bioadhesive treatment of esophageal disease and reduce systemic drug exposure
Source: Royal Society of Chemistry journal article supplement (doi:10.1039/d2nr01846b), 2022-01-01
Supplement: d2nr01846b1.pdf [file d2nr01846b1.pdf]

## Supplementary Materials for

### **Poly(lactic acid)-hyperbranched polyglycerol nanoparticles enhance bioadhesive treatment of esophageal disease and reduce systemic drug exposure**

Yang Mai<sup>1†</sup>, Yaqi Ouyang<sup>1†</sup>, Yujia Qin<sup>1</sup>, Changchang Jia<sup>2</sup>, Laura E. McCoubrey<sup>3</sup>, Abdul W. Basit<sup>3</sup>, Yichu Nie<sup>4</sup>, Yizhen Jia<sup>1</sup>, Liu Yu<sup>1</sup>, Liu Dou<sup>1</sup>, Wenbin Deng<sup>1</sup>, Yang Deng<sup>1\*</sup>, Yang Liu<sup>1\*</sup>

<sup>1</sup> School of Pharmaceutical Sciences (Shenzhen), Sun Yat-sen University, Guangzhou, 510275, China

<sup>2</sup> Cell-Gene Therapy Translational Medicine Research Center, The Third Affiliated Hospital of Sun Yat-sen University, Guangzhou, 510000, China

<sup>3</sup> UCL School of Pharmacy, University College London, 29–39 Brunswick Square, London WC1N 1AX, UK

<sup>4</sup> Clinical Research Institute, The First People's Hospital of Foshan & Sun Yat-sen University Foshan Hospital, Foshan, 528000, China

\* Correspondence: dengy67@mail.sysu.edu.cn; [liuyang65@mail.sysu.edu.cn](mailto:liuyang65@mail.sysu.edu.cn)

#### **This file includes:**

Figure S1. Schematic illustration of *in vitro* NPs adhesion ability assessment on poly-L-lysine coated plate.

Figure S2. *In vitro* characterization of NPs.

Figure S3. Effect of stimulated gastric fluid on the adhesion of BNPs to rat esophagus tissues

Figure S4. *Ex vivo* evaluation of NPs adhesion and diffusion on human esophagus tissues

Figure S5. Body weight and food intake changes of different treatments in pharmacodynamics study.

Figure S6. *In vivo* local and systemic toxicity evaluations of different treatments

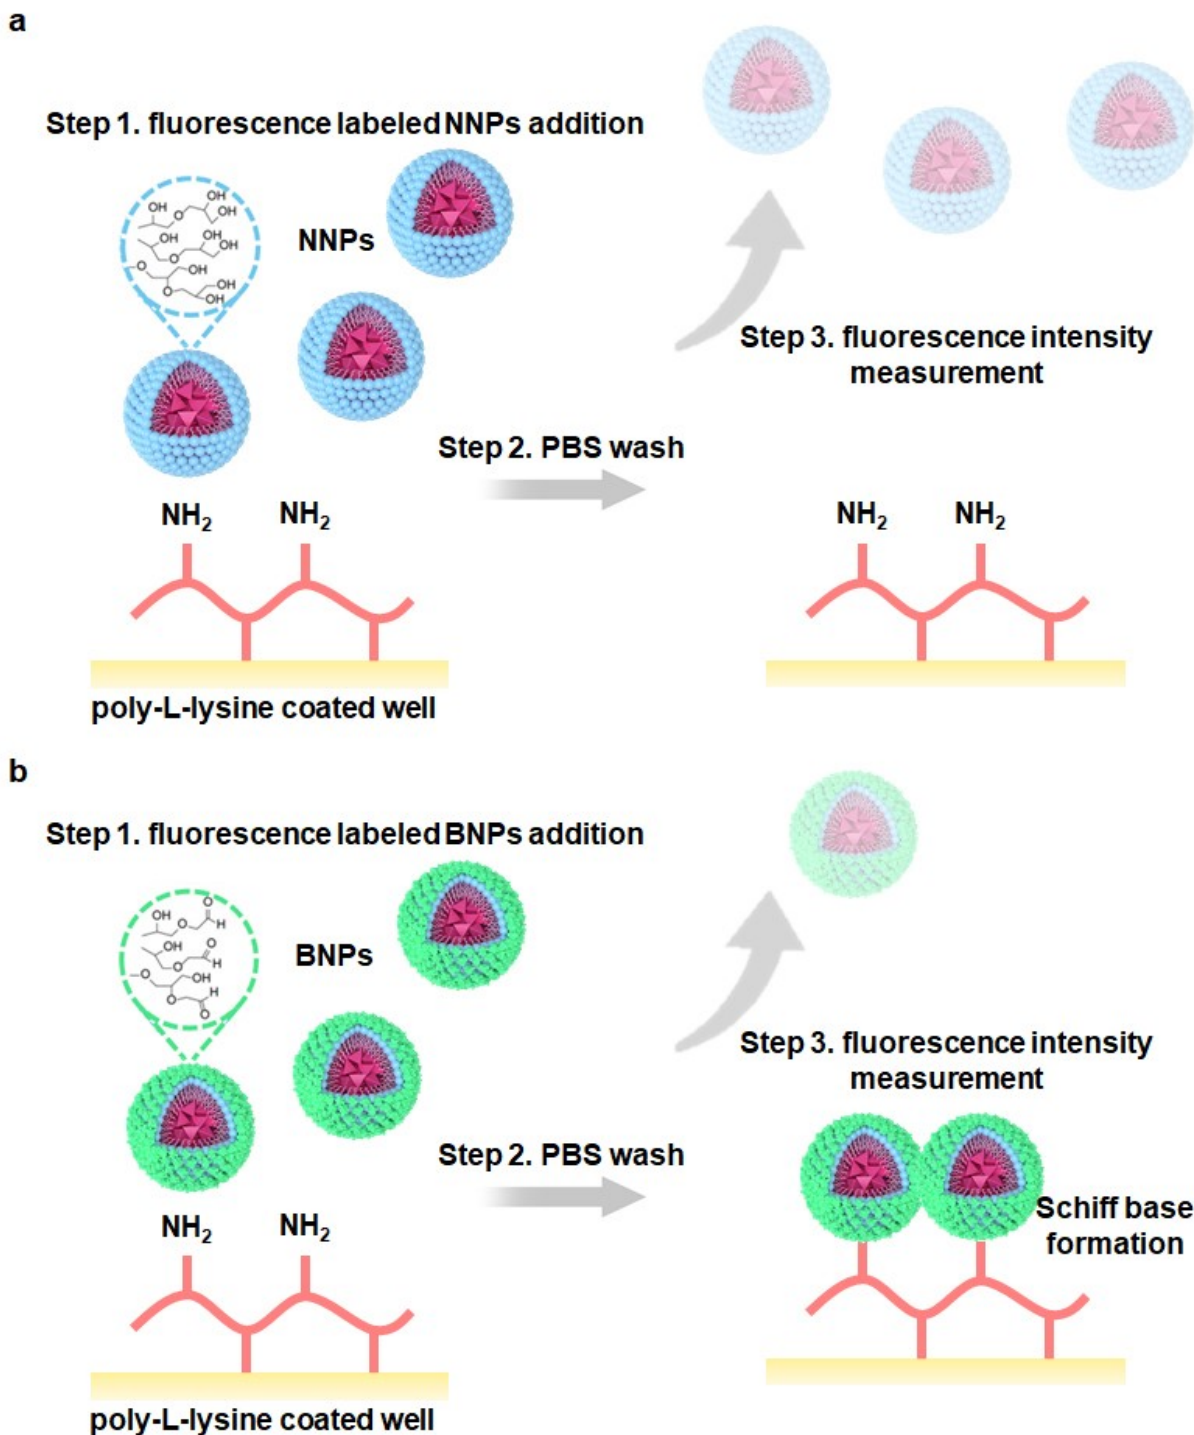

27

28 **Figure S1. Schematic illustration of *in vitro* NPs adhesion ability assessment on poly-L-lysine**  
 29 **coated plate.** a) PLA-Cy5/NNPs or b) PLA-Cy5/BNPs were added into poly-L-lysine coated plate  
 30 wells, respectively. After PBS washing, the remaining fluorescence intensity was measured in each  
 31 well. The recovery rate was calculated as the remaining fluorescence intensity in wells/the  
 32 fluorescence intensity of NNPs in wells before washing. BNPs would retain in wells due to the Schiff  
 33 base formation between BNPs and poly-L-lysines.

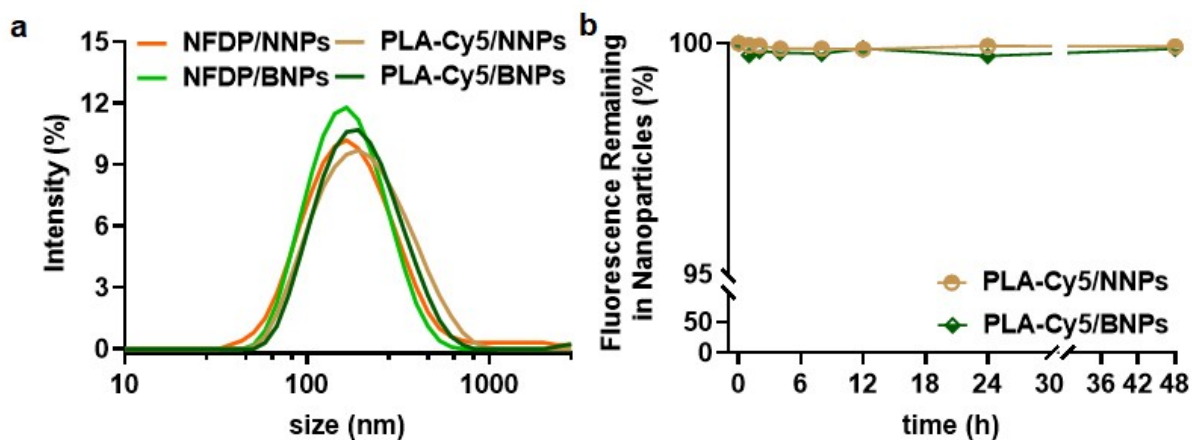

34

35 **Figure S2. *In vitro* characterization of NPs.** a) Hydrodynamic diameter distribution of  
 36 NFDPP/NNPs, NFDPP/BNPs, PLA-Cy5/NNPs and PLA-Cy5/BNPs by dynamic light scattering  
 37 (DLS). b) PLA-Cy5 retention within PLA-Cy5/NNPs and PLA-Cy5/BNPs incubated in PBS for  
 38 48 h at 37 °C. Data are shown as mean  $\pm$  s.d. ( $n = 5$ ).

39

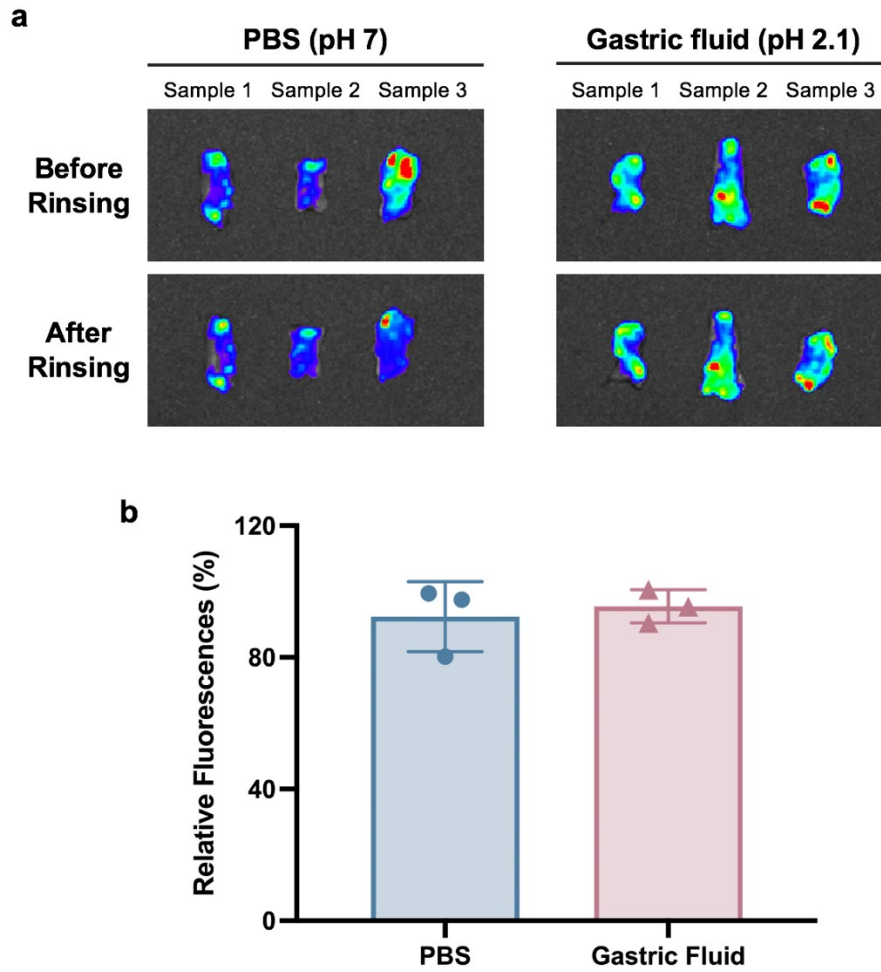

**Figure S3. Effect of stimulated gastric fluid on the adhesion of BNPs to rat esophagus tissues.**  
a) BNPs encapsulating PLA-Cy5 dye were added on the luminal surface of rat esophageal tissues for 15 s. *Ex vivo* tissue images were taken with Xenogen after 30 s with either PBS (pH = 7) or stimulated gastric fluid (pH = 2.1) rinsing. b) The fluorescence intensity of images after rinsing from a) was quantified and normalized by the fluorescence intensity of images before rinsing.

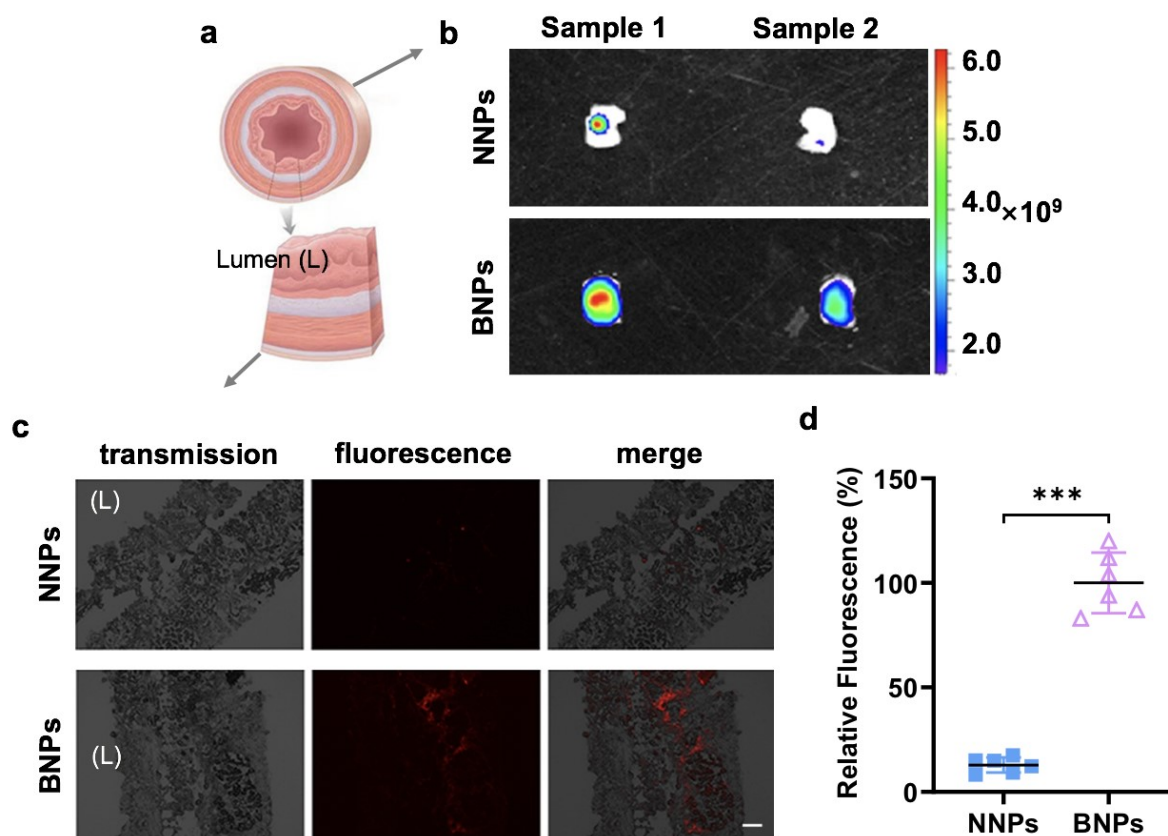

46 **Figure S4. *Ex vivo* evaluation of NPs adhesion and diffusion on human esophagus tissues.** a) 47 A diagram of the esophageal tissues used and imaged in this study. b) NPs and BNPs 48 encapsulating PLA-Cy5 dye were added on the luminal surface of human esophageal tissues for 49 15 s. *Ex vivo* tissue images were taken with Xenogen after 30 s saline rinsing. c) NPs and BNPs 50 encapsulating PLA-Cy5 dye were added on the luminal surface of human esophageal tissues for 51 15 s following by 1 h incubation at 37 °C. Frozen sections were collected and imaged with 52 fluorescence microscope. Left column, transmission channel; middle column, Cy5 fluorescence 53 channel, Cy5 signal in red; right column, merge images of left and middle columns. (L) indicated 54 as lumen side of the esophagus tissues. Scale bars, 100  $\mu$ m (applies to all images). d) The 55 fluorescence of images from **d** was quantified and normalized to the average fluorescence of BNPs 56 treated samples.

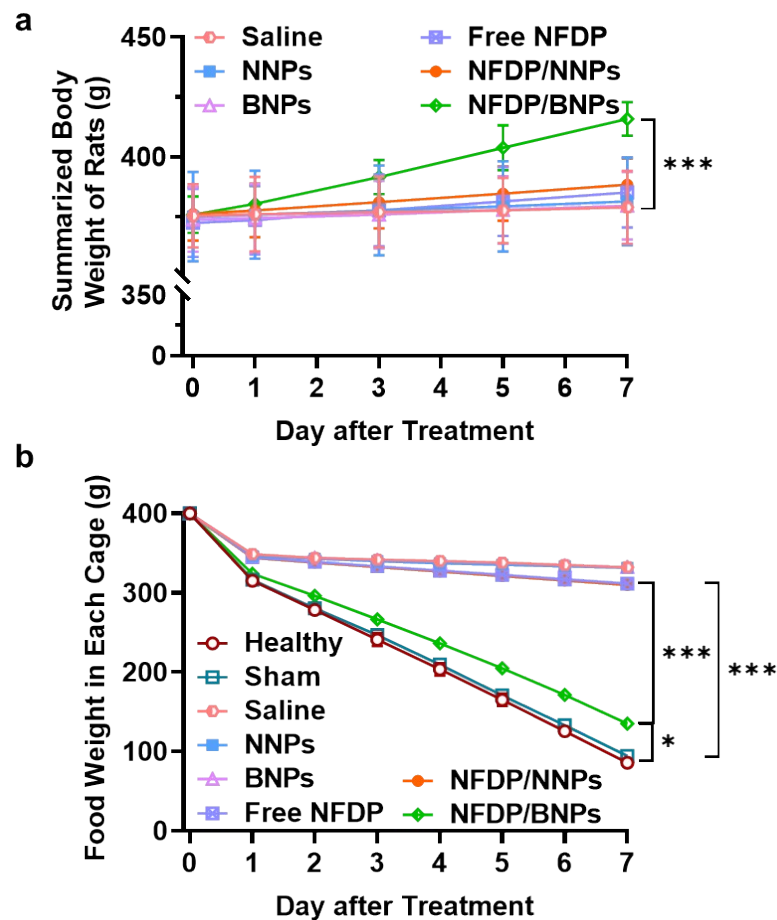

57

58 **Figure S5. Body weight and food intake changes of different treatments in**  
 59 **pharmacodynamics study.** a) Summarized rat body weight results of different treatment groups  
 60 during the treatment. Statistical analysis was made between data from saline group and  
 61 NFDP/BNPs group at day 7 after treatment. Data are shown as mean  $\pm$  s.d. ( $n = 5$ ). b) Food weight  
 62 changes in each cage (group) during the treatment. Statistical analysis was made between data  
 63 from untreated group and NFDP/BNPs group, from untreated group and NFDP/NNPs group and  
 64 from NFDP/BNPs group and NFDP/NNPs group, respectively, at day 7 after treatment. Data are  
 65 shown as mean  $\pm$  s.d. ( $n = 5$ ). Asterisks indicate:  $p < 0.05$  (\*) and  $p < 0.001$  (\*\*\*)



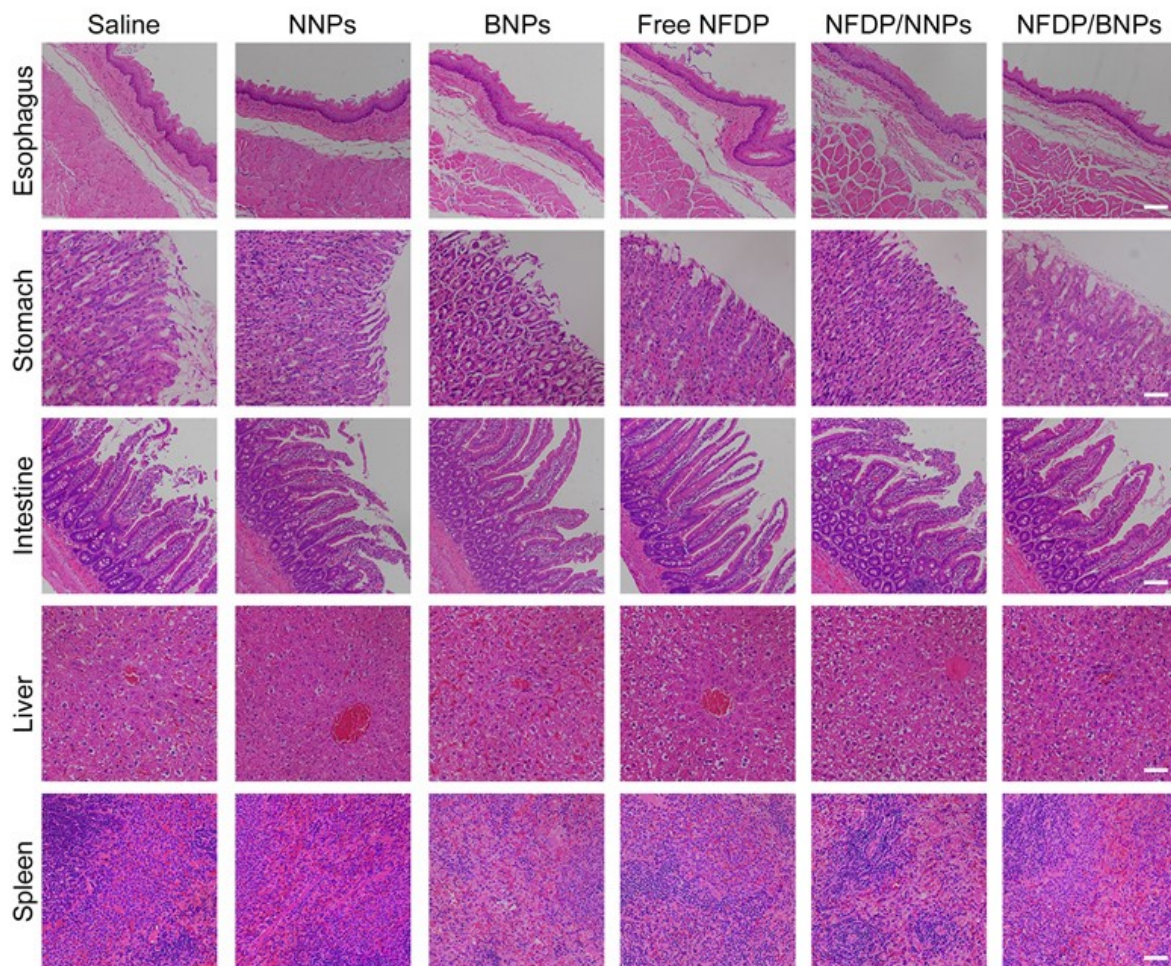

66

67 **Figure S6. *In vivo* local and systemic toxicity evaluations of different treatments.** H&E  
68 staining results of sections from tissues treated with saline as control, blank NNPs, blank BNPs,  
69 free NFDP, NFDP/NNPs and NFDP/BNPs. Images for esophagus and intestine were taken with  
70 the objective lens at 20x, scale bars: 200 μm; Images for stomach, liver and spleen were taken at  
71 40x, scale bars: 100 μm. These images are representative of multiple sections from  $n = 5$  for each  
72 group.
